# Supplementary material for: Prevalence of Polypharmacy, Hyperpolypharmacy and Potentially Inappropriate Medication Use in Older Adults in India: A Systematic Review and Meta-Analysis
Source: PubMed Central journal article supplement (PMC8173298; doi:10.3389/fphar.2021.685518), 2021-05-19
Supplement: DataSheet1.pdf [file DataSheet1.pdf]

**Table 1: Search strategy**

| PubMed/MEDLINE                                                                                                                                                                                                                                                                                                                                                                                                                                                                                                                                                                                                                                                                                                                                                                                                                                                                                                                                                                                                                                                                                                                                                                                                   | Sciencedirect/Scopus                                                                                                                                                                                                                                                                                                                                                                                                                                                                                                                                                                                                                                                                                                                                                                                                                                                                                                                                                                                                                                                                                                                                                                                                                                                                                                                                                    | Embase                                                                                                                                                                                                                                                                                                                                                                                                                                                                                                                                              | Google scholar                                                                                                                                                                                                                                                                                                                                                                                                                                                                                                                                                                                                                                                                                                           |
|------------------------------------------------------------------------------------------------------------------------------------------------------------------------------------------------------------------------------------------------------------------------------------------------------------------------------------------------------------------------------------------------------------------------------------------------------------------------------------------------------------------------------------------------------------------------------------------------------------------------------------------------------------------------------------------------------------------------------------------------------------------------------------------------------------------------------------------------------------------------------------------------------------------------------------------------------------------------------------------------------------------------------------------------------------------------------------------------------------------------------------------------------------------------------------------------------------------|-------------------------------------------------------------------------------------------------------------------------------------------------------------------------------------------------------------------------------------------------------------------------------------------------------------------------------------------------------------------------------------------------------------------------------------------------------------------------------------------------------------------------------------------------------------------------------------------------------------------------------------------------------------------------------------------------------------------------------------------------------------------------------------------------------------------------------------------------------------------------------------------------------------------------------------------------------------------------------------------------------------------------------------------------------------------------------------------------------------------------------------------------------------------------------------------------------------------------------------------------------------------------------------------------------------------------------------------------------------------------|-----------------------------------------------------------------------------------------------------------------------------------------------------------------------------------------------------------------------------------------------------------------------------------------------------------------------------------------------------------------------------------------------------------------------------------------------------------------------------------------------------------------------------------------------------|--------------------------------------------------------------------------------------------------------------------------------------------------------------------------------------------------------------------------------------------------------------------------------------------------------------------------------------------------------------------------------------------------------------------------------------------------------------------------------------------------------------------------------------------------------------------------------------------------------------------------------------------------------------------------------------------------------------------------|
| <p>"polypharmacy"[MeSH Terms] OR<br/>                     "polypharmacy"[All Fields]"beers criteria"[All Fields] AND<br/>                     "potential inappropriate medication"[All Fields] AND<br/>                     "india"[All Fields] AND<br/>                     "stopp 2 criteria"[All Fields] AND<br/>                     "stopp criteria"[All Fields]<br/>                     "hyperpolypharmacy"[All Fields]<br/>                     potentially inappropriate medication list"[All Fields]<br/>                     inappropriate medication, Beers, STOPP, inappropriate, medication, drug, use, prescribing, and elderly<br/>                     TS=("Potentially Inappropriate Medication List" OR<br/>                     "PIM List*" OR<br/>                     "Inappropriate Medication*" OR<br/>                     "Inappropriate Medicine*" OR<br/>                     "Inappropriate Prescrib*" OR<br/>                     "Inappropriate Prescription*" OR<br/>                     "Inappropriate Drug*" OR<br/>                     "Suboptimal Medication*" OR<br/>                     "Suboptimal Medicine" OR<br/>                     "Suboptimal Medicines" OR</p> | <p>"potentially inappropriate prescription*" OR<br/>                     "potentially inappropriate medication*" OR<br/>                     "potentially inappropriate medicine*" OR<br/>                     "potentially inappropriate drug*" OR<br/>                     "Beers Criteria" OR<br/>                     STOPP OR "Screening Tool of Older Person's Potentially Inappropriate Prescriptions" OR<br/>                     "PIM")<br/>                     "hyperpolypharmacy"[All Fields]<br/>                     TS=("Polypharmacy" OR<br/>                     "Polymedication*" OR<br/>                     "Polymedicine" OR<br/>                     "Polyprescription*" OR<br/>                     "Polydrug*" OR<br/>                     "Multiple Prescription*" OR<br/>                     "Multiple Prescrib*" OR<br/>                     "Multiple Medication*" OR<br/>                     "Multiple Medicine" OR<br/>                     "Multiple Medicines" OR<br/>                     "Multiple Drug*" OR<br/>                     "Multiple Drug Use" OR<br/>                     "Geriatric assessment" OR<br/>                     "Geriatric assessments" OR<br/>                     "Geriatric review" OR<br/>                     "Geriatric reviews") india AND<br/>                     'inappropriate prescribing'</p> | <p>"hyperpolypharmacy"[All Fields] 'potential inappropriate medication' OR<br/>                     (('potential'/exp OR potential) AND inappropriate AND ('medication'/exp OR medication)) 'beers criteria'/exp OR 'beers criteria' 'inappropriate prescribing'/exp OR 'inappropriate prescribing'<br/>                     'polypharmacy'/exp OR polypharmacy<br/>                     'stopp criteria'/exp OR 'stopp criteria'<br/>                     'older adults' AND 'inappropriate prescribing' india AND 'inappropriate prescribing'</p> | <p>potentially inappropriate medication OR<br/>                     prescribing OR Beers, STOPP, inappropriate, medication OR drug use<br/>                     "Beers Criteria" OR STOPP OR "Screening Tool of Older Person's Potentially Inappropriate Prescriptions" OR<br/>                     "PIM") Polypharmacy" OR<br/>                     "Polymedication*" OR<br/>                     "Polymedicine" OR<br/>                     "Polyprescription" OR<br/>                     "hyperpolypharmacy"[All Fields]<br/>                     OR "Polydrug*" OR<br/>                     "Multiple Prescription*" OR<br/>                     india AND<br/>                     'inappropriate prescribing'</p> |

|                                                                                                                                                                                                                                                                                                                                              |  |  |  |
|----------------------------------------------------------------------------------------------------------------------------------------------------------------------------------------------------------------------------------------------------------------------------------------------------------------------------------------------|--|--|--|
| <p>“Suboptimal Prescrib*”<br/>OR<br/>“Suboptimal Prescription*” OR<br/>“Suboptimal Drug Use”<br/>OR “Suboptimal Drugs”<br/>OR<br/>“Incorrect Medication*” OR<br/>“Incorrect Prescribing”<br/>OR “Incorrect Prescription*” OR<br/>“Incorrect Drug*” OR<br/>“potentially inappropriate prescrib*”.<br/>AND<br/>“inappropriate prescribing”</p> |  |  |  |
|----------------------------------------------------------------------------------------------------------------------------------------------------------------------------------------------------------------------------------------------------------------------------------------------------------------------------------------------|--|--|--|

Supplementary Table 2: Excluded articles with reason

| No | Authors                                                                  | Title                                                                                                                                                                                                      | Year | Reason for exclusion  |
|----|--------------------------------------------------------------------------|------------------------------------------------------------------------------------------------------------------------------------------------------------------------------------------------------------|------|-----------------------|
| 1  | Tejus A., Saxena S.K., Dwivedi A.K., Salmani M.F., Pradhan S.            | Analysis of the prescription pattern of psychotropics in an outpatient department of a general hospital psychiatry unit                                                                                    | 2020 | Conference abstract   |
| 2  | Asiri S., Mahmoudi F., Pasha A., Leyli E.K.                              | Drug use pattern among elderly people referred to the retirement centers                                                                                                                                   | 2018 | Conference abstract   |
| 3  | Al-Qerem W., Jarrar Y.B., Al-Sheikh I., Elmaadani A.                     | The prevalence of drug-drug interactions and polypharmacy among elderly patients in Jordan                                                                                                                 | 2018 | Conference abstract   |
| 4  | Nishandar T.B., Kale A.S., Pise H.N.                                     | Drug utilization pattern in geriatric patients attending outpatient department at rural tertiary care hospital in Maharashtra                                                                              | 2017 | Conference abstract   |
| 5  | Joseph J., Ramesh M., Harugeri A., Parthasarathi G., Basavanagowdappa H. | Frequency and nature of medication-related problems in elderly Indian inpatients                                                                                                                           | 2016 | Conference abstract   |
| 6  | Kolhe A., Kale A.S., Padwal S.L.                                         | Drug utilization study in geriatric patients at rural tertiary care hospital                                                                                                                               | 2015 | Conference abstract   |
| 7  | Hummel J.                                                                | Ambulatory Care for Geriatric Patients [Ambulante Versorgung geriatrischer Patienten: Altersmedizin]                                                                                                       | 2020 | Editorial             |
| 8  | Tetteh E.K.                                                              | Reducing avoidable medication-related harm: What will it take?                                                                                                                                             | 2019 | Editorial             |
| 9  | Salhotra R., Tyagi A.                                                    | Medication errors: They continue                                                                                                                                                                           | 2019 | Editorial             |
| 10 | Olaniyan J.O., Ghaleb M., Dhillon S., Robinson P.                        | Safety of medication use in primary care                                                                                                                                                                   | 2015 | Editorial             |
| 11 | Saqlain M., Ahmed Z., Butt S.A., Khan A., Ahmed A., Ali H.               | Prevalence of potentially inappropriate medications use and associated risk factors among elderly cardiac patients using the 2015 American Geriatrics Society beers criteria                               | 2020 | Population irrelevant |
| 12 | Heydari M., Mehraeen M., Joulaei H.                                      | Over medication and waste of resources in physicians' prescriptions: A cross sectional study in Southwestern Iran                                                                                          | 2020 | Population irrelevant |
| 13 | Tefera G.M., Feyisa B.B., Umata G.T., Kebede T.M.                        | Predictors of prolonged length of hospital stay and in-hospital mortality among adult patients admitted at the surgical ward of Jimma University medical center, Ethiopia: Prospective observational study | 2020 | Population irrelevant |
| 14 | Thinuan P., Siviroj P., Lerttrakarnnon P., Lorga T.                      | Prevalence and potential predictors of frailty among community-dwelling older persons in Northern Thailand: A cross-sectional study                                                                        | 2020 | Population irrelevant |

|    |                                                                                                                 |                                                                                                                                                                                                                                          |      |                       |
|----|-----------------------------------------------------------------------------------------------------------------|------------------------------------------------------------------------------------------------------------------------------------------------------------------------------------------------------------------------------------------|------|-----------------------|
| 15 | Mishore K.M., Girma Y., Tola A., Mekuria A.N., Ayele Y.                                                         | Evaluation of Medication Use Pattern Among Patients Presenting to the Emergency Department of Hiwot Fana Specialized University Hospital, Using WHO Prescribing Indicators                                                               | 2020 | Population irrelevant |
| 16 | Kucukdagli P., Bahat G., Bay I., Kilic C., Oren M.M., Turkmen B.O., Karan M.A.                                  | The relationship between common geriatric syndromes and potentially inappropriate medication use among older adults                                                                                                                      | 2020 | Population irrelevant |
| 17 | Saqlain M., Ali H., Kamran S., Munir M.U., Jahan S., Mazhar F.                                                  | Potentially inappropriate medications use and its association with health-related quality of life among elderly cardiac patients                                                                                                         | 2020 | Population irrelevant |
| 18 | Nagai T., Wakabayashi H., Maeda K., Momosaki R., Nishiyama A., Murata H., Uei H.                                | Influence of potentially inappropriate medications on activities of daily living for patients with osteoporotic vertebral compression fractures: A retrospective cohort study                                                            | 2020 | Population irrelevant |
| 19 | Bose N.M., Mathew M., Joy B., Joel J.J., Ks R., Raj B., Nandakumar U.P., Vijayan A.                             | Assessment of drug related problems in the general medicine ward of a multispeciality teaching hospital                                                                                                                                  | 2019 | Population irrelevant |
| 20 | Albaghdadi O., Morteza M.H., Rahi F.A.                                                                          | Potentially inappropriate medications use in a population of iraqi geriatric outpatients according to beers criteria                                                                                                                     | 2019 | Population irrelevant |
| 21 | Saboor M., Momtaz Y.A., Kamrani A.-A.A., Sahaf R.                                                               | Prescription pattern among Iranian community dwelling older adults                                                                                                                                                                       | 2019 | Population irrelevant |
| 22 | Kaplan Ç., Bilge U., Acar N., Ünlüoğlu İ.                                                                       | Determination of polypharmacy and inappropriate drug use in patients aged over 65 years who presented to the emergency department [Acil servise başvuran 65 yaş üzeri hastalarda polifarmasi ve uygunsuz ilaç kullanımının belirlenmesi] | 2019 | Population irrelevant |
| 23 | Chang C.-B., Lai H.-Y., Hwang S.-J., Yang S.-Y., Wu R.-S., Liu H.-C., Chan D.-C.                                | Prescription of potentially inappropriate medication to older patients presenting to the emergency department: a nationally representative population study                                                                              | 2018 | Population irrelevant |
| 24 | Prasert V., Akazawa M., Shono A., Chanjaruporn F., Ploylearmsang C., Muangyim K., Wattanapongsatit T., Sutin U. | Applying the Lists of Risk Drugs for Thai Elderly (LRDTE) as a mechanism to account for patient age and medicine severity in assessing potentially inappropriate medication use                                                          | 2018 | Population irrelevant |
| 25 | Abegaz T.M., Birru E.M., Mekonnen G.B.                                                                          | Potentially inappropriate prescribing in Ethiopian geriatric patients hospitalized with cardiovascular disorders using START/STOPP criteria                                                                                              | 2018 | Population irrelevant |
| 26 | Biswas A., Sinha N., Ray K., Tripathi S.K.                                                                      | A study on drug use and medication management perspectives among elderly and the impact of professional oversight                                                                                                                        | 2018 | Population irrelevant |

|    |                                                                                                                                |                                                                                                                                                                              |      |                       |
|----|--------------------------------------------------------------------------------------------------------------------------------|------------------------------------------------------------------------------------------------------------------------------------------------------------------------------|------|-----------------------|
| 27 | Yilmaz F., Colak M.Y.                                                                                                          | Evaluation of inappropriate medication use and compliance in elderly people                                                                                                  | 2018 | Population irrelevant |
| 28 | Abdulah R., Insani W.N., Destiani D.P., Rohmaniasari N., Mohenathas N.D., Barliana M.I.                                        | Polypharmacy leads to increased prevalence of potentially inappropriate medication in the Indonesian geriatric population visiting primary care facilities                   | 2018 | Population irrelevant |
| 29 | Ozalas S.M., Huang V., Brunetti L., Reilly T.                                                                                  | Comparison of two versions of the Beers criteria and adverse outcomes in older hospitalized patients                                                                         | 2017 | Population irrelevant |
| 30 | Bahat G., Bay I., Tufan A., Tufan F., Kilic C., Karan M.A.                                                                     | Prevalence of potentially inappropriate prescribing among older adults: A comparison of the Beers 2012 and Screening Tool of Older Person's Prescriptions criteria version 2 | 2017 | Population irrelevant |
| 31 | Rathod Mrudangsinh M., Achankunju A., John R.M., Sam G.K.                                                                      | A study to review the appropriateness of drug dosage in renally impaired patient by identifying, analysing, and adjusting dosages in a tertiary care teaching hospital       | 2017 | Population irrelevant |
| 32 | Lim L.M., McStea M., Chung W.W., Azmi N.N., Aziz S.A.A., Alwi S., Kamarulzaman A., Kamaruzzaman S.B., Chua S.S., Rajasuriar R. | Prevalence, risk factors and health outcomes associated with polypharmacy among urban community-dwelling older adults in multiethnic Malaysia                                | 2017 | Population irrelevant |
| 33 | Gencer M.Z., Arica S.                                                                                                          | Use of polypharmacy and herbal medication on quality of life in elderly patients at Okmeydani Hospital's polyclinics in Istanbul, Turkey                                     | 2017 | Population irrelevant |
| 34 | Al-Hashar A., Al Sinawi H., Al Mahrizi A., Al-Hatrushi M.                                                                      | Prevalence and covariates of polypharmacy in elderly patients on discharge from a tertiary care hospital in Oman                                                             | 2016 | Population irrelevant |
| 35 | Pradhan S., Panda A., Panigrahy S.R.                                                                                           | Analysis of drug utilization pattern in elderly in an outpatient department using WHO indicators: A cross-sectional study                                                    | 2016 | Population irrelevant |
| 36 | Ramanath K.V., Chaudhary S.                                                                                                    | Study on pharmaceutical care in geriatrics of a rural tertiary care hospital                                                                                                 | 2016 | Population irrelevant |
| 37 | Hudhra K., García-Caballeros M., Casado-Fernandez E., Jucja B., Shabani D., Bueno-Cavanillas A.                                | Polypharmacy and potentially inappropriate prescriptions identified by Beers and STOPP criteria in co-morbid older patients at hospital discharge                            | 2016 | Population irrelevant |
| 38 | Cullinan S., O'Mahony D., O'Sullivan D., Byrne S.                                                                              | Use of a frailty index to identify potentially inappropriate prescribing and adverse drug reaction risks in older patients                                                   | 2016 | Population irrelevant |
| 39 | Prasanth N.V., Vinod B.                                                                                                        | A prospective surveillance study on the prevalence and influential determinants of polypharmacy in hospitalized geriatric patients                                           | 2016 | Population irrelevant |

|    |                                                                                             |                                                                                                                                                                                       |      |                       |
|----|---------------------------------------------------------------------------------------------|---------------------------------------------------------------------------------------------------------------------------------------------------------------------------------------|------|-----------------------|
| 40 | Fadare J.O., Desalu O.O., Obimakinde A.M., Adeoti A.O., Agboola S.M., Aina F.O.             | Prevalence of inappropriate medication prescription in the elderly in Nigeria: A comparison of Beers and STOPP criteria                                                               | 2015 | Population irrelevant |
| 41 | Chou C.-L., Perng D.-W., Lin T.-L., Lin A.M.-Y., Chen T.-J., Wu M.-S., Chou Y.-C.           | Analysis of Prescription Pattern and Guideline Adherence in the Management of Asthma among Medical Institutions and Physician Specialties in Taiwan between 2000 and 2010             | 2015 | Population irrelevant |
| 42 | Ahmad A., Khan M.U., Haque I., Ivan R., Dasari R., Revanker M., Pravina A., Kuriakose S.    | Evaluation of potential drug - drug interactions in general medicine ward of teaching hospital in Southern India                                                                      | 2015 | Population irrelevant |
| 43 | Chang C.-B., Yang S.-Y., Lai H.-Y., Wu R.-S., Liu H.-C., Hsu H.-Y., Hwang S.-J., Chan D.-C. | Application of three different sets of explicit criteria for assessing inappropriate prescribing in older patients: A nationwide prevalence study of ambulatory care visits in Taiwan | 2015 | Population irrelevant |
| 44 | Abraham F., Varughese G., Mathew J.C., John P.M., Sam G.K.                                  | Drug utilization pattern among geriatric patients in a tertiary care teaching Hospital                                                                                                | 2015 | Population irrelevant |
| 45 | Bhad R., Hazari N.                                                                          | Combining pharmacological treatments in geriatric population: Weighing the balance                                                                                                    | 2015 | Population irrelevant |
| 46 | Rasu R.S., Iqbal M., Hanifi S.M.A., Moula A., Hoque S., Rasheed S., Bhuiya A.               | Level, pattern, and determinants of polypharmacy and inappropriate use of medications by village doctors in a rural area of Bangladesh                                                | 2014 | Population irrelevant |
| 47 | Hien H., Berthé A., Drabo M.K., Meda N., Konaté B., Tou F., Badini-Kinda F., Macq J.        | Prevalence and patterns of multimorbidity among the elderly in Burkina Faso: Cross-sectional study                                                                                    | 2014 | Population irrelevant |
| 48 | Clares J.W.B., De Freitas M.C., Borges C.L.                                                 | Social and clinical factors causing mobility limitations in the elderly [Fatores sociais e clínicos que causam limitação da mobilidade de idosos]                                     | 2014 | Population irrelevant |
| 49 | Jhaveri B., Patel T., Barvaliya M., Tripathi C.B.                                           | Drug utilization pattern and pharmaco-economic analysis in geriatric medical in-patients of a tertiary care hospital of India                                                         | 2014 | Population irrelevant |
| 50 | Zyoud S.H., Abd-Alhafez A.B., Hussein A.O., Abu-Shehab I.S., Al-Jabi S.W., Sweileh W.M.     | Patterns of use of medications, herbal products and nutritional supplements and polypharmacy associating factors in Palestinian geriatric patients                                    | 2014 | Population irrelevant |
| 51 | Shah V.N.                                                                                   | Drug utilization pattern and pharmaco-economic analysis in geriatric medical in-patients of a tertiary care hospital of India                                                         | 2014 | Population irrelevant |
| 52 | Thakkar K.B., Jain M.M., Billa G., Joshi A., Khobragade A.A.                                | A drug utilization study of psychotropic drugs prescribed in the psychiatry outpatient department of a tertiary care hospital                                                         | 2013 | Population irrelevant |

|    |                                                                                               |                                                                                                                                                                 |      |                       |
|----|-----------------------------------------------------------------------------------------------|-----------------------------------------------------------------------------------------------------------------------------------------------------------------|------|-----------------------|
| 53 | Eng M.L., Birch J.T., Jr.                                                                     | Medication use and polypharmacy in older adults                                                                                                                 | 2013 | Population irrelevant |
| 54 | Fadare J.O., Agboola S.M., Opeke O.A., Alabi R.A.                                             | Prescription pattern and prevalence of potentially inappropriate medications among elderly patients in a Nigerian rural tertiary hospital                       | 2013 | Population irrelevant |
| 55 | Dhamija P., Bansal D., Srinivasan A., Bhalla A., Hota D., Chakrabarti A.                      | Patterns of prescription drug use and incidence of drug-drug interactions in patients reporting to medical emergency                                            | 2013 | Population irrelevant |
| 56 | Abreu M.S., Ferreira S.D.A., Ferreira L.P.L., Toneo Júnior J.F., Maciel W.V., Maciel S.S.S.V. | Prevalence and costs of hospitalizations for poisoning and accidental intoxication in Brazilian elderly                                                         | 2013 | Population irrelevant |
| 57 | Wu C., Bell C.M., Wodchis W.P.                                                                | Incidence and economic burden of adverse drug reactions among elderly patients in Ontario emergency departments: A retrospective study                          | 2012 | Population irrelevant |
| 58 | Romana A., Kamath L., Sarda A., Muraraiah S., Jayanthi C.R.                                   | Polypharmacy leading to adverse drug reactions in elderly in a tertiary care hospital                                                                           | 2012 | Population irrelevant |
| 59 | Yong T.Y., Lau S.Y., Li J.Y., Hakendorf P., Thompson C.H.                                     | Medication prescription among elderly patients admitted through an acute assessment unit                                                                        | 2012 | Population irrelevant |
| 60 | Grover S., Kumar V., Avasthi A., Kulhara P.                                                   | First prescription of new elderly patients attending the psychiatry outpatient of a tertiary care institute in North India                                      | 2012 | Population irrelevant |
| 61 | Rambhade S., Chakarborty A., Shrivastava A., Patil U.K., Rambhade A.                          | A survey on polypharmacy and use of inappropriate medications                                                                                                   | 2012 | Population irrelevant |
| 62 | Ramanath K.V., Nedumballi S.                                                                  | Assessment of medication-related problems in geriatric patients of a rural tertiary care hospital                                                               | 2012 | Population irrelevant |
| 63 | Pudasaini N., Singh C., Sagar G.C., Sapkota S.                                                | Drug prescribing pattern and prescription error in elderly: A retrospective study of inpatient record                                                           | 2011 | Population irrelevant |
| 64 | Arvind Nag K., Umesh M., Churi S.                                                             | Assessment of drug-drug interactions in hospitalised patients in India                                                                                          | 2011 | Population irrelevant |
| 65 | Pudasaini N., Singh C., Gc S., Sujata S.                                                      | Drug prescribing pattern and prescription error in elderly: A retrospective study of inpatient record                                                           | 2011 | Population irrelevant |
| 66 | Ünsal A., Demir G.                                                                            | The prevalence of chronic disease and drug use in the elderly in central Kirşehir                                                                               | 2010 | Population irrelevant |
| 67 | Harugeri A., Joseph J., Parthasarathi G., Ramesh M., Guido S.                                 | Prescribing patterns and predictors of high-level polypharmacy in the elderly population: A prospective surveillance study from two teaching hospitals in india | 2010 | Population irrelevant |

|    |                                                                                           |                                                                                                                                                  |      |                       |
|----|-------------------------------------------------------------------------------------------|--------------------------------------------------------------------------------------------------------------------------------------------------|------|-----------------------|
| 68 | Joseph J., Ramesh M., Harugeri A., Parthasarathi G., Basavanagowdappa H.                  | Frequency and nature of medication-related problems in elderly Indian inpatients                                                                 | 2010 | Population irrelevant |
| 69 | Pote S., Tiwari P., D'Cruz S.                                                             | Medication prescribing errors in a public teaching hospital in India: A prospective study                                                        | 2007 | Population irrelevant |
| 70 | Alam K., Mishra P., Prabhu M., Shankar P.R., Palaian S., Bhandari R.B., Bista D.          | A study on rational drug prescribing and dispensing in outpatients in a tertiary care teaching hospital of Western Nepal                         | 2006 | Population irrelevant |
| 71 | Mandavi, Tiwari P.                                                                        | Profile of pharmacotherapy in elderly Indian patients: Preliminary findings                                                                      | 2006 | Population irrelevant |
| 72 | Rehan H.S., Singh C., Tripathi C.D., Kela A.K.                                            | Study of drug utilization pattern in dental OPD at tertiary care teaching hospital.                                                              | 2001 | Population irrelevant |
| 73 | St. Louis E.K.                                                                            | Truly "rational" polytherapy: Maximizing efficacy and minimizing drug interactions, drug load, and adverse effects                               | 2009 | Population irrelevant |
| 74 | Banning M.                                                                                | A review of interventions used to improve adherence to medication in older people                                                                | 2009 | Population irrelevant |
| 75 | Sonal Sekhar M., Adheena Mary C., Anju P.G., Hamsa N.A.                                   | Study on drug related hospital admissions in a tertiary care hospital in South India                                                             | 2011 | Population irrelevant |
| 76 | Sharma R., Arora M., Garg R., Bansal P.                                                   | A closer look at the 2019 Beers criteria                                                                                                         | 2020 | Review                |
| 77 | Karlsson S., Ridbäck A., Brobeck E., Norell Pejner M.                                     | Health Promotion Practices in Nursing for Elderly Persons in Municipal Home Care: An Integrative Literature Review                               | 2020 | Review                |
| 78 | Khan N., Chattopadhyay K., Leonardi-Bee J.                                                | Incidence, prevalence, risk factors and health consequences of polypharmacy in adults in South Asia: A systematic review protocol                | 2019 | Review                |
| 79 | Shitu Z., Aung M.M.T., Kamauzaman T.H.T., Bhagat V., Rahman A.F.A.                        | Medication error in hospitals and effective intervention strategies: A systematic review                                                         | 2019 | Review                |
| 80 | Verma A., Aggarwal S., Garg S., Anand P.                                                  | Geriatric health care in India: A review                                                                                                         | 2019 | Review                |
| 81 | Baclet N., Ficheur G., Alfandari S., Ferret L., Senneville E., Chazard E., Beuscart J.-B. | Explicit definitions of potentially inappropriate prescriptions of antibiotics in older patients: a compilation derived from a systematic review | 2017 | Review                |



|    |                                                                               |                                                                                                                                       |      |        |
|----|-------------------------------------------------------------------------------|---------------------------------------------------------------------------------------------------------------------------------------|------|--------|
| 82 | Mohamadloo A., Ramezankhani A., Zarein-Dolab S., Salamzadeh J., Mohamadloo F. | A systematic review of main factors leading to irrational prescription of medicine                                                    | 2017 | Review |
| 83 | Patel T.K., Patel P.B.                                                        | Incidence of adverse drug reactions in Indian hospitals: A systematic review of prospective studies                                   | 2016 | Review |
| 84 | Nagaratnam N., Nagaratnam K., Cheuk G.                                        | Diseases in the elderly: Age-related changes and pathophysiology                                                                      | 2016 | Review |
| 85 | Porter G., Grills N.                                                          | Medication misuse in India: A major public health issue in India                                                                      | 2016 | Review |
| 86 | Nagaraju K., Manasa S., Manjunath R.                                          | Pharmacovigilance study in geriatric population                                                                                       | 2015 | Review |
| 87 | Nivya K., Sri Sai Kiran V., Ragoo N., Jayaprakash B., Sonal Sekhar M.         | Systemic review on drug related hospital admissions - A pubmed based search                                                           | 2015 | Review |
| 88 | Rubio-Valera M., Chen T.F., O'Reilly C.L.                                     | New Roles for Pharmacists in Community Mental Health Care: A Narrative Review                                                         | 2014 | Review |
| 89 | Skoog J., Midlöv P., Beckman A., Sundquist J., Halling A.                     | Drugs prescribed by general practitioners according to age, gender and socioeconomic status after adjustment for multimorbidity level | 2014 | Review |
| 90 | Gupta M., Agarwal M.                                                          | Understanding medication errors in the elderly                                                                                        | 2013 | Review |
| 91 | Jose J.                                                                       | Promoting drug safety in elderly - Needs a proactive approach                                                                         | 2012 | Review |
| 92 | Sergi G., De Rui M., Sarti S., Manzato E.                                     | Polypharmacy in the elderly: Can comprehensive geriatric assessment reduce inappropriate medication use?                              | 2011 | Review |

**Supplementary Table 3:** Quality assessment of included studies using Newcastle-Ottawa scale adapted for cohort and cross-sectional studies

| Cohort study                 | Selection                       |                         |                            |                            | Comparability <sup>5</sup> | Exposure                 |                                |                       | Total |
|------------------------------|---------------------------------|-------------------------|----------------------------|----------------------------|----------------------------|--------------------------|--------------------------------|-----------------------|-------|
|                              | Representativeness <sup>1</sup> | Selection <sup>2</sup>  | Ascertainment <sup>3</sup> | Demonstration <sup>4</sup> |                            | Assessment <sup>6</sup>  | Duration <sup>7</sup>          | Adequacy <sup>8</sup> |       |
| Chandrasekhar D et al., 2019 | 1                               | 1                       | 1                          | 1                          | 1                          | 1                        | 1                              | 1                     | 8     |
| Motallebzadeh N et al., 2019 | 1                               | 1                       | 1                          | 1                          | 1                          |                          | 1                              | 1                     | 7     |
| Benjamin D et al., 2018      | 1                               | 1                       | 1                          | 1                          | 1                          | 1                        | 1                              | 1                     | 8     |
| Devarapalli P et al., 2017   | 1                               | 1                       | 1                          | 1                          | 1                          | 1                        | 1                              | 1                     | 8     |
| Kumar R et al., 2017         | 1                               | 1                       | 1                          | 1                          | 1                          | 1                        | 1                              | 1                     | 8     |
| Narvekar R S et al., 2017    | 1                               | 1                       | 1                          | 1                          | 1                          | 1                        | 1                              | 1                     | 8     |
| Anjum SM et al., 2017        | 1                               | 1                       | 1                          | 1                          | 1                          | 1                        | 1                              | 1                     | 8     |
| Burla S et al., 2016         | 1                               | 1                       | 1                          | 1                          | 1                          | 1                        | 1                              | 1                     | 8     |
| Kashyapa M et al., 2015      | 1                               | -                       | 1                          | 1                          | 1                          | 1                        | 1                              | 1                     | 7     |
| Pattani D et al., 2015       | 1                               | -                       | 1                          | 1                          | 1                          | 1                        | 1                              | 1                     | 7     |
| Umar NF et al., 2015         | 1                               | 1                       | 1                          | 1                          | 1                          | 1                        | 1                              | 1                     | 8     |
| Undela K et al., 2013        | 1                               | 1                       | 1                          | 1                          | 1                          | 1                        | 1                              | 1                     | 8     |
| Dhikav V et al., 2014        | -                               | -                       | 1                          | 1                          | 1                          | 1                        | 1                              | 1                     | 6     |
| Momin TG et al., 2013        | 1                               | -                       | 1                          | 1                          | 1                          | 1                        | 1                              | 1                     | 7     |
| Vishwas HN et al., 2012      | 1                               | 1                       | 1                          | 1                          | 1                          | 1                        | 1                              | 1                     | 8     |
| Shah RB et al., 2011         | 1                               | 1                       | 1                          | 1                          | 1                          | 1                        | 1                              | 1                     | 8     |
| Mandavi et al., 2011         | 1                               | 1                       | 1                          | 1                          | 1                          | 1                        | 1                              | 1                     | 8     |
| Zaveri HG et al., 2010       | 1                               | 1                       | 1                          | 1                          | 1                          | 1                        | 1                              | 1                     | 8     |
| Harugeri A et al., 2010      | 1                               | 1                       | 1                          | 1                          | 1                          | 1                        | 1                              | 1                     | 8     |
| Cross-sectional study        | Selection                       |                         |                            |                            | Comparability <sup>5</sup> | Outcome                  |                                | Total                 |       |
|                              | Representativeness <sup>9</sup> | Selection <sup>10</sup> | Definition <sup>11</sup>   | Assessment <sup>12</sup>   |                            | Assessment <sup>13</sup> | Statistical test <sup>14</sup> |                       |       |
| Bhatt AN et al., 2019        | 1                               | 1                       | 0                          | 1                          | 2                          | 2                        | 1                              | 8                     |       |
| Pradhan S et al., 2018       | 1                               | 1                       | 1                          | 1                          | 2                          | 2                        | 1                              | 9                     |       |
| Pradhan S et al., 2017       | 1                               | 1                       | 1                          | 1                          | 2                          | 2                        | 1                              | 9                     |       |

|                            |   |   |   |   |   |   |   |   |
|----------------------------|---|---|---|---|---|---|---|---|
| Borah L et al., 2017       | - | - | 1 | 1 | - | 2 | - | 4 |
| Rakesh KB et al., 2017     | 1 | 1 |   | 1 | 2 | 2 | - | 7 |
| Salwe K J et al., 2016     | 1 | 1 | 1 | 1 | - | 2 | - | 6 |
| Chowta MN et al., 2016     | - | - | - | 1 | 2 | 2 | - | 5 |
| Karandikar YS et al., 2013 | 1 | - | - | 2 | 2 | 2 | 1 | 8 |

1: Truly or somewhat representative of the exposed cohort; 2: Selection of the non-exposed cohort; 3: Assessment by structured interviews or surgical medical records; 4: Demonstration that outcome of interest was not present at start of study; 5: Study controls for the most important factor or any additional factor; 6: Assessment of outcome; 7: Follow-up long enough for outcomes to occur; 8: Adequacy of follow-up of cohorts. 9: sample representativeness; 10: sample selection procedure; 11: exposure definition; 12: risk factor exposure assessment; 13: Assessment of the outcome; 14: Statistical test is appropriate or not.

**Supplemental Figure 1: Funnel plots**

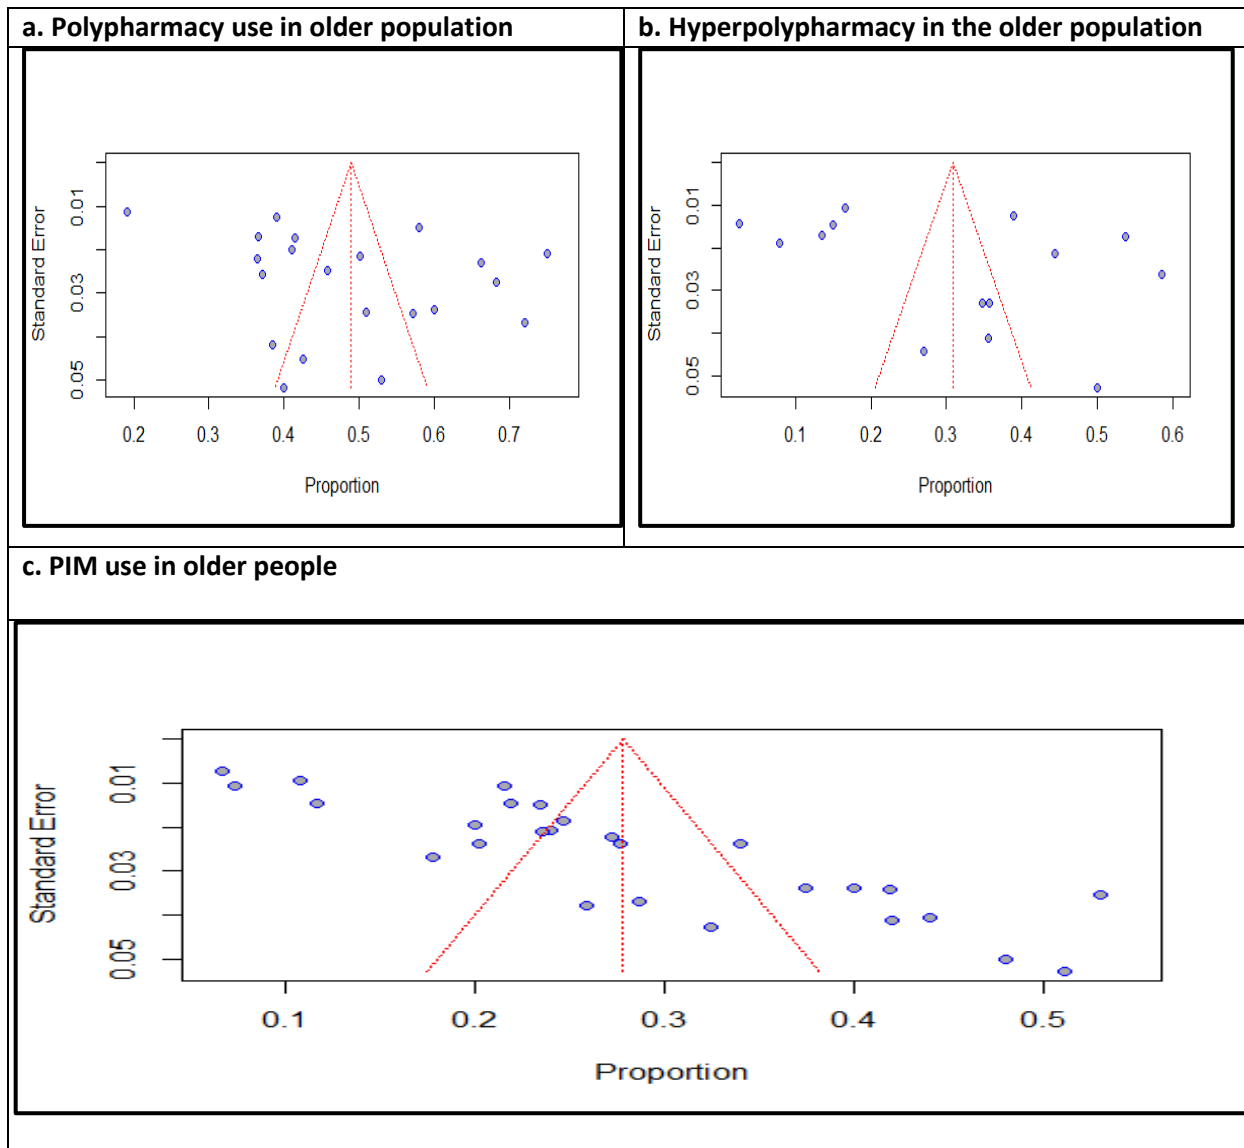

**Egger and Begg tests**

| <b>Outcome</b>                         | <b>Egger's test</b> | <b>Begg's test</b> |
|----------------------------------------|---------------------|--------------------|
| Polypharmacy                           | 0.034               | 0.304              |
| Hyperpolypharmacy                      | 0.211               | 0.352              |
| Potential inappropriate medication use | 0.027               | 0.001              |
